Hodgkin lymphoma (HL), and non-Hodgkin lymphoma (NHL) have not been well documented.

**Methods/Case Report:** All autologous stem cell collection patients between 2017-2021 were retrospectively reviewed and categorized by primary diagnosis. Patients received a mobilization regimen of G-CSF alone, G-CSF and plerixafor, G-CSF and chemotherapy, or G-CSF, plerixafor, and chemotherapy. CD34+ stem cell collection results were recorded. All units of CD34+ stem cells were processed according to protocol and viability was assessed by Trypan blue method on a thawed aliquot 2 weeks after processing.

**Results (if a Case Study enter NA):** 385 patients (271 MM, 41 DLBCL, 30 HL, and 43 NHL patients; male: 242; female: 143; age range: 16-78) were identified. Binomial logistic regression demonstrated that use of plerixafor with G-CSF was negatively associated with meeting CD34+ goal collection (OR= -1.57, p= 0.003) compared to G-CSF alone. This result was particularly true for MM patients (OR= -1.62, p= 0.014). A pairwise t-test indicated that patients receiving G-CSF and plerixafor had lower CD34+ cell viabilities (t= 2.21, p = 0.028); after Bonferroni correction for multiple comparisons, MM samples also had significantly lower percentage viability than DLBCL (p= 0.003) or HL (p= 0.022) samples.

**Conclusion:** A higher percentage of patients mobilized on G-CSF alone were able to meet collection goal versus patients who were mobilized on G-CSF and plerixafor. Patients who received G-CSF and plerixafor had significantly lower viability than those who received G-CSF alone. We hypothesize these findings to be due to lower baseline mobilization for patients on G-CSF and plerixafor.

### Two Individuals with Rare Blocked Antigen Phenomenon and Coinciding Warm Autoantibody Mimicking Alloanti-Jk3 Resolved with JK Analysis

J.G. Zinni,<sup>1</sup> D. Mullins,<sup>1</sup> P.J. DeChristopher,<sup>2</sup> G. Ramsey,<sup>3</sup> B. Vission,<sup>4</sup> M. Stef,<sup>5</sup> <sup>1</sup>Immunohematology Reference Laboratory, Versiti Illinois, Aurora, Illinois, UNITED STATES; <sup>2</sup>Pathology and Laboratory Medicine, Loyola University Medical Center, Maywood, Illinois, UNITED STATES; <sup>3</sup>Pathology and Laboratory Medicine, Northwestern Memorial Hospital, Chicago, Illinois, UNITED STATES; <sup>4</sup>Blood Bank, Loyola University Medical Center, Maywood, Illinois, UNITED STATES; <sup>5</sup>Immunohematology Center & Clinical Laboratory, Grifols, San Marcos, Texas, UNITED STATES

**Introduction/Objective:** Kidd antigens can bind complement (C3) as well as Kidd specific warm autoantibodies (WAAb). An 838G>A single nucleotide variant (SNV) defines JK\*01 and JK\*02 which codes the antithetical

Jka and Jk b, respectively. Both alleles translate the high prevalence (>99%) Jk3 (JK3). The 130G>A is associated with weak Jka and weak Jkb expression. In vivo binding of non-agglutinating globulins can cause false-negative phenotypes by means of the blocked antigen phenomenon (BAP).

**Methods/Case Report:** Transfusions were requested for a 74-year-old Caucasian (CA) female with Evan's Syndrome, and an 85-year-old African American (AA) female with metastatic uterine cancer. Both had a history of nonspecific WAAb. Direct antiglobulin testing (DAT) detected moderate in vivo sensitization of IgG and C3. They phenotyped Jk(a- b-) with untreated and EDTA glycine-acid (EGA) treated IgG DAT-negative cells. Their serum contained anti-Jk3 reactivity, while a panreactive WAAb in the eluate reacted with Jk3- donor and EGA treated DAT-negative autologous cells. Weak anti-Jka and anti-Jkb reactivity remained in the alloadsorbed serum of the antithetical adsorbing cells.

Genetic testing of the CA revealed JK\*01W.01(130A)/02 alleles, while cDNA confirmed the alleles would be transcribed into mRNA. Sequencing of the AA detected 130G/A, and 838G/A as well as other silent mutations predicting either a Jk(a+wb+) or Jk(a+b+w) phenotype. The CA received one compatible JK:-3 transfusion, and both individuals benefited from multiple least incompatible transfusions of Jk a+ and/or Jk b+ donors with expected hemoglobin increases (1 g/dL per transfusion). The CA serologically phenotyped Jk(a-b+) 132 days later following prolonged immunosuppressive therapy while a normocytic normochromic anemia and the WAAb persisted. No follow up evaluations of the AA are available.

**Results (if a Case Study enter NA):** NA

**Conclusion:** Unexpected BAP can confound immunohematology testing and lead WAAbs mimicking alloanti-Jk3 to be mischaracterized as allogeneic. By predicting phenotypes, genetic analysis can aid serological techniques in antibody characterization and help circumvent complications searching for rare JK:-3 donors.

### Leukostasis aggravated by red blood cell transfusion in a chronic lymphocytic leukemia patient

H. Jum'ah,<sup>1</sup> M. Chitsaz,<sup>1</sup> S. Kundrapu,<sup>1</sup> <sup>1</sup>Pathology, Metrohealth Medical Center/Case Western Reserve University, Cleveland, Ohio, UNITED STATES

**Introduction/Objective:** Leukostasis/symptomatic hyperleukocytosis is commonly seen in acute leukemias and is characterized by high blast counts and symptoms of decreased tissue perfusion with a one-week mortality of 20-40%, if left untreated. It is a rare complication in chronic lymphocytic leukemia (CLL) and is seen in CLL patients with white blood cell (WBC) counts > 500x10<sup>9</sup>/L. Studies have shown that transfusion of blood

# First and Only FDA Cleared Digital Cytology System

**Genius™ Cervical AI**

**Genius™ Review Station**

**Genius™ Digital Imager**

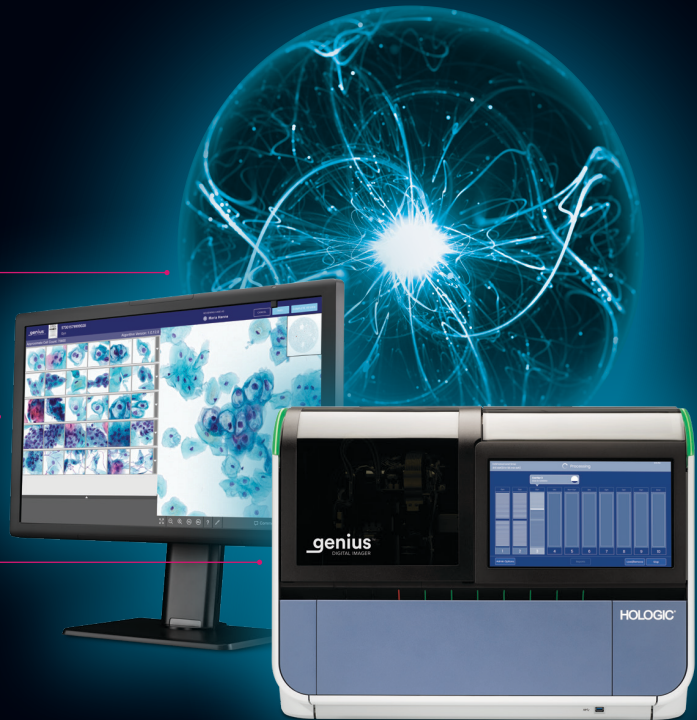

## Empower Your Genius With Ours

**Make a Greater Impact on Cervical Cancer**  
with the Advanced Technology of the  
Genius™ Digital Diagnostics System

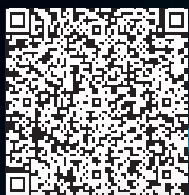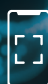

Click or Scan  
to discover more

ADS-04159-001 Rev 001 © 2024 Hologic, Inc. All rights reserved. Hologic, Genius, and associated logos are trademarks and/or registered trademarks of Hologic, Inc. and/or its subsidiaries in the United States and/or other countries. This information is intended for medical professionals in the U.S. and other markets and is not intended as a product solicitation or promotion where such activities are prohibited. Because Hologic materials are distributed through websites, podcasts and tradeshows, it is not always possible to control where such materials appear. For specific information on what products are available for sale in a particular country, please contact your Hologic representative or write to [diagnostic.solutions@hologic.com](mailto:diagnostic.solutions@hologic.com).

**genius™**  
DIGITAL DIAGNOSTICS
